# Supplementary material
Source: ML conference proceedings conference paper supplement (https://openreview.net/forum?id=4LHz4IFGLQ-)

Translate time

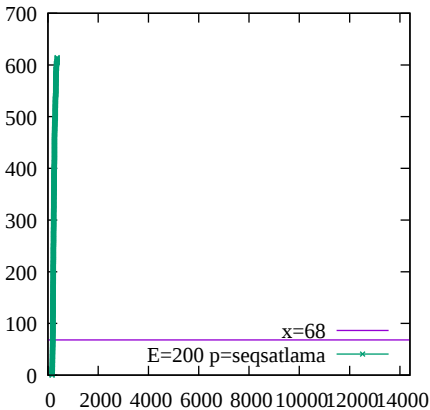

Supplement: supplementary_material [file attachment]

Translate+initialization time

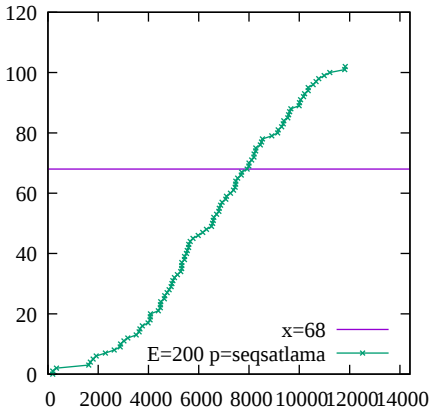

Supplement: supplementary_material [file attachment]

Actual search time

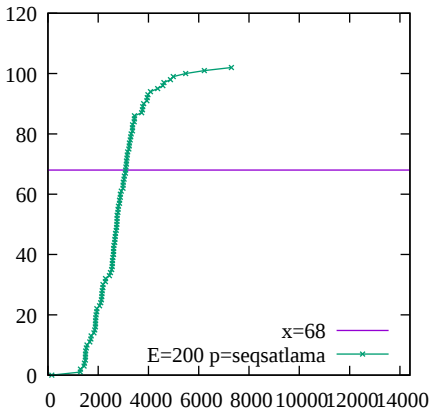

Supplement: supplementary_material [file attachment]

Total elapsed time

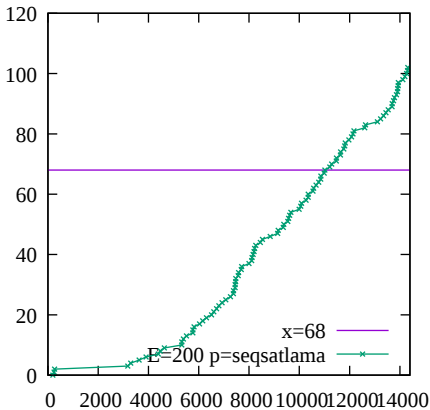

Supplement: supplementary_material [file attachment]

Translate+initialization time

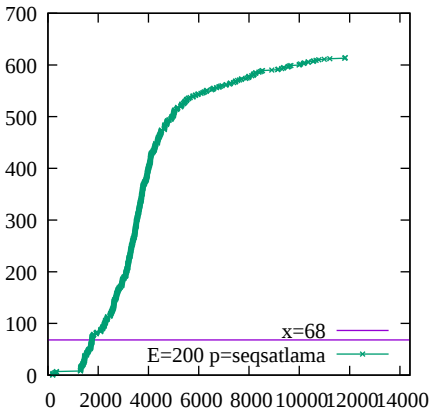

Supplement: supplementary_material [file attachment]

Actual search time

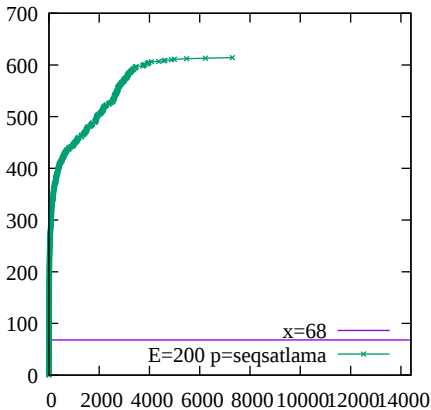

Supplement: supplementary_material [file attachment]

Total elapsed time

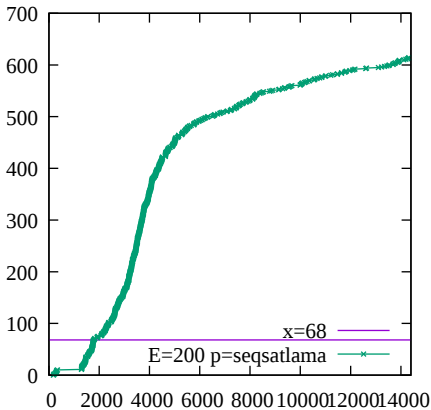

Supplement: supplementary_material [file attachment]

Translate time

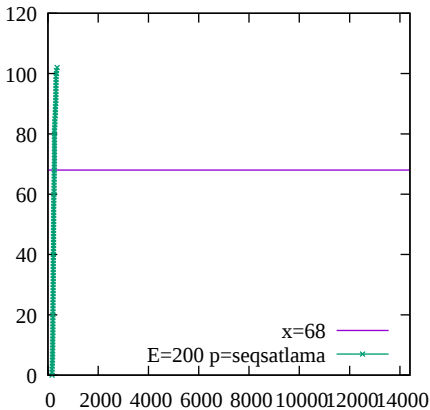

Supplement: supplementary_material [file attachment]
